# Supplementary material for: Effects of poly (ADP-ribose) polymerase-1 (PARP-1) inhibition on sulfur mustard-induced cutaneous injuries in vitro and in vivo
Source: PeerJ. 2016 Apr 4;4:e1890. doi: 10.7717/peerj.1890 (PMC4830333; doi:10.7717/peerj.1890)
Supplement: Table S1 [file peerj-04-1890-s001.xlsx]

## Sheet: Raw data for Fig1 A&B
The raw numbers involved in Fig 1 A&B.
group	pADPr signal/μM2 nuclear area，imagej
	1	2	3	4	5	6	7	8	9	10	mean	SD
SM 0μM	5.812	10.067	3.908	9.5	9.433	7.732	9.102	5.975	5.452	9.492	8.1347	4.4535
	19.972	11.366	15.025	8.178	2.777	9.401	3.35	5.009	11.445	7.812
	4.266	13.629	19.526	5.922	8.206	4.179	4.918	2.434	4.468	5.685
SM 100μM	23.136	37.398	34.337	32.538	48.056	25.427	29.623	18.807	21.837	26.075	23.5266	8.81126
	22.472	29.987	17.543	27.211	34.435	19.978	18.962	8.199	6.925	9.756
	26.412	26.757	22.709	24.51	24.338	15.238	18.343	13.375	22.491	18.922
SM 1000μM	55.574	51.254	42.791	24.994	52.579	33.249	36.265	33.577	38.29	63.808	48.8465	12.0776
	44.327	47.615	46.045	63.054	34.971	51.893	52.937	41.288	34.215	51.149
	48.548	67.964	42.614	62.174	49.957	79.802	49.023	57.149	64.051	44.237
SM 0μM +ABT888	6.472	3.79	14.571	10.868	4	5.59	5.38	1.477	3.948	2.793	6.91937	3.19223
	9.783	13.157	8.754	11.211	4.921	7.707	4.403	4.762	3.949	5.703
	7.395	6.967	7.033	4.622	6.197	10.909	9.157	5.497	11.089	5.476
SM 100μM +ABT888	24.035	30.446	26.914	18.16	18.989	19.327	14.932	15.341	10.383	13.061	18.0827	6.6264
	29.464	21.115	24.043	21.034	26.345	8.897	7.224	12.552	12.916	11.393
	18.73	16.947	18.034	18.299	15.043	19.877	32.049	8.849	17.203	10.878
SM 1000μM + ABT888	13.237	17.032	10.619	10.332	13.191	13.527	10.224	39.63	32.976	10.215	20.3053	10.7292
	53.518	18.092	24.067	20.921	16.868	16.14	19.591	13.005	16.983	16.052
	31.654	18.694	36.768	12.148	14.853	35.491	31.475	12.807	10.128	18.921

## Sheet: Raw data for Fig1 C&D
The raw numbers involved in Fig1 C&D. (pADPr)						Experiment 1							Experiment 2							Experiment 3
group	pADPr								ABT-888							ABT-888							ABT-888
	1	2	3			SM 0	SM 100μM	SM 1000μM	SM 0	SM 100μM	SM 1000μM		SM 0	SM 100μM	SM 1000μM	SM 0	SM 100μM	SM 1000μM		SM 0	SM 100μM	SM 1000μM	SM 0	SM 100μM	SM 1000μM
SM 0μM	42527.3	41782.2	58357.2
SM 100μM	90750.9	68417	43338
SM 1000μM	129101	117499	108429
SM 0μM + ABT-888	54875.5	43736.4	45682.7
SM 100μM + ABT-888	69453.7	59328	58329
SM 1000μM + ABT-888	74723.4	64738.6	57317.3
The raw numbers involved in Fig1 C&D. (GAPDH)					pADPr
group	GAPDH
	1	2	3
SM 0μM	32002.4	25307	27631.4
SM 100μM	30597.5	26254.3	21802.2
SM 1000μM	28244.7	25638.2	25580.8
SM 0μM + ABT-888	31065.1	28659.7	28863.8		GAPDH
SM 100μM + ABT-888	30605.8	26749.8	31763.4
SM 1000μM + ABT-888	33204.5	27073.6	29653
The raw numbers involved in Fig1 C&D. (Normalized pADPr)
group	Normalized pADPr
	1	2	3
SM 0μM	1.32888	1.65101	2.11199
SM 100μM	2.96596	2.60594	1.98779
SM 1000μM	4.5708	4.58296	4.23867
SM 0μM + ABT-888	1.76647	1.52606	1.5827
SM 100μM + ABT-888	2.2693	2.21789	1.83636
SM 1000μM + ABT-888	2.2504	2.39121	1.93293

## Sheet: Raw data for Fig1 E
The raw numbers involved in Fig1 E. (Hoechst 33342)
group	Hoechst 33342: Total Intensity
	1	2	3
SM 0μM	21527932	20969832	36289256
SM 100μM	10662809	17018052	12135185
SM 1000μM	7480191	7881527	5202035
SM 0μM + ABT888	14037762	20053348	16963638
SM 100μM + ABT888	8219640	12900410	12206723
SM 1000μM + ABT888	5547271	5903166	6967378
The raw numbers involved in Fig1 E. (pADPr)
group	pADPr: Total Intensity
	1	2	3
SM 0μM	8210122	8233238	14916226
SM 100μM	6708337	10948290	6536062
SM 1000μM	7163335	11750882	6135512
SM 0μM + ABT888	6916651	7286412	9884064
SM 100μM + ABT888	5116893	6398937	5652386
SM 1000μM + ABT888	3389145	4140421	5495605
The raw numbers involved in Fig1 E. (pADPr/Hoechst 33342)
group	pADPr/Hoechst 33342
	1	2	3
SM 0μM	0.381371	0.392623	0.411037
SM 100μM	0.629134	0.643334	0.538604
SM 1000μM	0.957641	1.49094	1.17944
SM 0μM + ABT888	0.492718	0.363351	0.582662
SM 100μM + ABT888	0.62252	0.496026	0.463055
SM 1000μM + ABT888	0.610957	0.70139	0.788762

## Sheet: Raw data for Fig1 F
The raw numbers involved in Fig1 F
ABT-888 (nM)	PARP-1 inhibition(%)
	1	2	3	mean	SD
0.1	-0.51	4.26	-1.27	0.826667	2.99754
1	1.33	14.37	8.7	8.13333	6.53844
10	5.95	44.34	36.87	29.0533	20.3537
100	62.18	82.95	77.9	74.3433	10.8322
1000	88.09	97.56	95.31	93.6533	4.94759
10000	93.52	99.51	97.84	96.9567	3.09115
