# Supplementary material for: Effects of poly (ADP-ribose) polymerase-1 (PARP-1) inhibition on sulfur mustard-induced cutaneous injuries in vitro and in vivo
Source: PeerJ. 2016 Apr 4;4:e1890. doi: 10.7717/peerj.1890 (PMC4830333; doi:10.7717/peerj.1890)
Supplement: Table S2 [file peerj-04-1890-s002.xlsx]

## Sheet: Raw data for Fig2 A&B
The raw numbers involved in Fig2 A. (6h post SM exposure)
group	Cell Survival(%)-CCK-8
	1	2	3	4	5	6	mean	SD
SM 0μM	97.365	101.054	97.365	101.581	101.976	100.395	99.956	2.07586
SM 100μM	86.693	87.747	95.652	85.244	87.088	84.058	87.747	4.09653
SM 1000μM	47.299	61.001	62.319	51.383	62.846	60.343	57.5318	6.53627
SM 0μM + ABT888	106.719	101.845	101.318	103.953	105.929	102.24	103.667	2.25331
SM 100μM + ABT888	86.693	88.801	89.855	89.196	91.436	89.196	89.1962	1.54097
SM 1000μM + ABT888	79.842	82.477	84.058	83.004	84.19	82.345	82.6527	1.58033
The raw numbers involved in Fig2 B. (24h post SM exposure)
group	Cell Survival(%)-CCK-8
	1	2	3	4	5	6	mean	SD
SM 0μM	99.939	97.752	102.369	89.234	100.517	110.108	99.9865	6.76778
SM 100μM	45.261	37.728	39.307	64.41	67.09	78.937	55.4555	17.0052
SM 1000μM	3.584	2.005	2.734	6.864	7.71	6.441	4.88967	2.40549
SM 0μM + ABT888	102.977	93.499	91.069	87.844	105.92	106.871	98.03	8.2174
SM 100μM + ABT888	50	46.598	52.916	64.269	68.359	75.411	59.5922	11.4402
SM 1000μM + ABT888	4.435	2.612	3.463	6.723	9.826	9.544	6.1005	3.09918
