# Supplementary material for: Effects of poly (ADP-ribose) polymerase-1 (PARP-1) inhibition on sulfur mustard-induced cutaneous injuries in vitro and in vivo
Source: PeerJ. 2016 Apr 4;4:e1890. doi: 10.7717/peerj.1890 (PMC4830333; doi:10.7717/peerj.1890)
Supplement: Table S3 [file peerj-04-1890-s004.xlsx]

## Sheet: Raw data for Fig3 B
The raw numbers involved in Fig 3 B
Group	Epidermis necrosis scroe
	1	2	3	4	5	6	7
Con	0	0	0	0	0	-	-
0.16mg SM/ear	2	3	1	3	2	-	-
0.16mg SM/ear+ABT-888	3	2	3	2	2	-	-
0.64mg SM/ear	4	4	4	4	3	4	4
0.64mg SM/ear+ABT-888	2	2	2	3	2	2	3

## Sheet: Raw data for Fig3 C
The raw numbers involved in Fig 3 C
Group	REW (%)
	1	2	3	4	5	6	7
Con	0	0	0	0	0	-	-
0.16mg SM/ear	138	128.26	183.06	154.6	169.35	-	-
0.16mg SM/ear+ABT-888	158.21	171.43	134.92	174.07	213.33	-	-
0.64mg SM/ear	198.39	191.2	198.45	180.87	202.56	264.55	197.81
0.64mg SM/ear+ABT-888	126.35	139.67	201.82	200.81	130.51	66.27	188.14
