# Supplementary material for: Effects of poly (ADP-ribose) polymerase-1 (PARP-1) inhibition on sulfur mustard-induced cutaneous injuries in vitro and in vivo
Source: PeerJ. 2016 Apr 4;4:e1890. doi: 10.7717/peerj.1890 (PMC4830333; doi:10.7717/peerj.1890)
Supplement: Table S4 [file peerj-04-1890-s005.xlsx]

## Sheet: Raw data for Fig4 A&B
The raw numbers involved in Fig 4 A - 6h post SM exposure
group	NAD content(%)
	1	2	3	mean	SD
SM 0μM	114	95.5	90.5	100	12.3794
SM 100μM	71.4	60.6	64.4	65.4667	5.47844
SM 1000μM	8.6	7.3	9.7	8.53333	1.20139
SM 0μM + ABT888	97.2	104.9	99.2	100.433	3.99541
SM 100μM + ABT888	73.8	110.8	88.3	90.9667	18.6436
SM 1000μM + ABT888	46.6	52.4	48.3	49.1	2.98161
The raw numbers involved in Fig 4 B - 24h post SM exposure
group	NAD content(%)
	1	2	3	mean	SD
SM 0μM	94.8	108.6	96.5	99.9667	7.52485
SM 100μM	47.7	49.4	45.2	47.4333	2.11266
SM 1000μM	1.7	-0.3	0.1	0.5	1.0583
SM 0μM + ABT888	94	113.2	105.4	104.2	9.65609
SM 100μM + ABT888	52	56.2	52.1	53.4333	2.39653
SM 1000μM + ABT888	2.1	2.5	2.4	2.33333	0.208167

## Sheet: Raw data for Fig4 C&D
The raw numbers involved in Fig 4 C - 6h post SM exposure
group	ATP content(%)
	1	2	3	4	5	6	mean	SD
SM 0μM	134.739	117.02	102.428	93.682	74.9987	76.9654	99.9721	23.2291
SM 100μM	79.1688	94.7551	68.4532	87.6008	78.9626	91.44	83.3968	9.71831
SM 1000μM	44.4446	81.4122	71.8722	88.3071	63.1646	88.3071	72.918	17.0456
SM 0μM + ABT888	101.523	84.647	104.501	98.7734	79.9637	100.986	95.0657	10.1601
SM 100μM + ABT888	99.9066	96.4324	99.9066	73.0127	76.0022	69.0267	85.7145	14.5041
SM 1000μM + ABT888	97.1792	109.428	102.747	104.31	89.456	105.547	101.445	7.10487
The raw numbers involved in Fig 4 D - 24h post SM exposure
group	ATP content(%)
	1	2	3	4	5	6	mean	SD
SM 0μM	115.908	104.893	118.662	93.8038	86.4158	80.6695	100.059	15.6322
SM 100μM	82.0533	79.6138	73.515	73.4536	73.4536	58.8236	73.4855	8.07387
SM 1000μM	3.41426	25.9754	10.9346	13.6739	18.5271	27.0202	16.5909	9.1073
SM 0μM + ABT888	102.506	114.64	144.974	111.825	91.8367	90.171	109.325	20.1226
SM 100μM + ABT888	98.9538	90.7385	89.3692	76.65	68.5536	88.2164	85.4136	10.9202
SM 1000μM + ABT888	16.7681	28.1971	10.2372	38.1123	29.2849	-3.81785	19.797	15.1938
