# Supplementary material for: Effects of poly (ADP-ribose) polymerase-1 (PARP-1) inhibition on sulfur mustard-induced cutaneous injuries in vitro and in vivo
Source: PeerJ. 2016 Apr 4;4:e1890. doi: 10.7717/peerj.1890 (PMC4830333; doi:10.7717/peerj.1890)
Supplement: Table S5 [file peerj-04-1890-s006.xlsx]

## Sheet: Raw data for Fig5 A&B
The raw numbers involved in Fig 5 A - 6h post SM exposure
group	Caspase 3/7 activity(%)
	1	2	3	4	5	6	mean	SD
SM 0μM	110	99	92	105	99	95	100	6.57267
SM 100μM	422	376	403	365	332	397	382.5	31.9045
SM 1000μM	1407	1344	1418	1368	1280	1342	1359.83	50.2331
SM 0μM + ABT888	108	97	100	89	102	97	98.8333	6.30608
SM 100μM + ABT888	500	457	516	492	498	541	500.667	27.7537
SM 1000μM + ABT888	1251	1207	1228	1305	1249	1184	1237.33	41.841
The raw numbers involved in Fig 5 B - 24h post SM exposure
group	Caspase 3/7 activity(%)
	1	2	3	4	5	6	mean	SD
SM 0μM	96	100	104	91	104	105	100	5.54977
SM 100μM	407	407	428	440	435	335	408.667	38.6816
SM 1000μM	267	302	291	283	242	238	270.5	26.2659
SM 0μM + ABT888	87	97	106	87	96	101	95.6667	7.58068
SM 100μM + ABT888	334	361	340	345	342	355	346.167	10.0283
SM 1000μM + ABT888	195	247	207	193	202	199	207.167	20.1437

## Sheet: Raw data for Fig5C
Protein expression of PARP-1 - 6h post SM exposure

## Sheet: Raw data for Fig5D
Protein expression of PARP-1 - 24h post SM exposure

## Sheet: Raw data for Fig5E
The raw numbers involved in Fig 5 E - 6h post SM exposure
group	Apoptosis cell(%)
	1	2	3	mean	SD
SM 0μM	1.81	2.59	4.6	3	1.43948
SM 100μM	2.76	3.99	5.64	4.13	1.4451
SM 1000μM	19.59	17.76	17.94	18.43	1.00861
SM 0μM + ABT888	1.62	1.7	3.16	2.16	0.866949
SM 100μM + ABT888	5.65	6.98	7.86	6.83	1.11261
SM 1000μM + ABT888	14.54	14.2	13.21	13.9833	0.690966
group	Necrosis cell(%)
	1	2	3	mean	SD
SM 0μM	3.66	5.65	8.57	5.96	2.46964
SM 100μM	2.97	3.83	6.74	4.51333	1.97571
SM 1000μM	12.14	16.09	21.1	16.4433	4.49044
SM 0μM + ABT888	3.26	6.43	8.38	6.02333	2.58411
SM 100μM + ABT888	3.53	4.72	4.54	4.26333	0.641431
SM 1000μM + ABT888	5.61	4.99	9.28	6.62667	2.31867
SM 0μM
SM 100μM
SM 1000μM
SM 0μM + ABT888
SM 100μM + ABT888
SM 1000μM + ABT888

## Sheet: Raw data for Fig5F
The raw numbers involved in Fig 5 F - 24h post SM exposure
group	Apoptosis cell(%)
	1	2	3	mean	SD
SM 0μM	0.85	0.94	0.67	0.82	0.137477
SM 100μM	8.8	7.43	4.31	6.84667	2.30114
SM 1000μM	14.58	14.24	10.21	13.01	2.43082
SM 0μM + ABT888	1.77	1.46	1.6	1.61	0.155242
SM 100μM + ABT888	6.9	6.99	6.11	6.66667	0.484183
SM 1000μM + ABT888	12.82	14.82	9.13	12.2567	2.88653
group	Necrosis cell(%)
	1	2	3	mean	SD
SM 0μM	13.82	11.23	12.77	12.6067	1.3027
SM 100μM	45.93	45.34	53.46	48.2433	4.52739
SM 1000μM	76.22	78.71	82.9	79.2767	3.37586
SM 0μM + ABT888	7.86	8.9	12.22	9.66	2.27719
SM 100μM + ABT888	37.38	35.83	34.51	35.9067	1.43654
SM 1000μM + ABT888	78.48	74.48	79.16	77.3733	2.52866
SM 0μM
SM 100μM
SM 1000μM
SM 0μM + ABT888
SM 100μM + ABT888
SM 1000μM + ABT888
