# Supplementary material for: Effects of poly (ADP-ribose) polymerase-1 (PARP-1) inhibition on sulfur mustard-induced cutaneous injuries in vitro and in vivo
Source: PeerJ. 2016 Apr 4;4:e1890. doi: 10.7717/peerj.1890 (PMC4830333; doi:10.7717/peerj.1890)
Supplement: Table S8 [file peerj-04-1890-s009.xlsx]

## Sheet: Raw data for Fig8 A$B
The raw numbers involved in Fig 8A - 6h post SM exposure
group		Phospho-AKT(Thr308)
		1	2	3	mean	SD
NC shRNA	SM 0μM	452	725.5	518	565.167	142.72
	SM 100μM	1100	818	890.5	936.167	146.441
	SM 1000μM	681.5	610	565.5	619	58.5214
PARP-1 shRNA	SM 0μM	397	646	582	541.667	129.307
	SM 100μM	751	1014.5	868	877.833	132.025
	SM 1000μM	653	609.5	532	598.167	61.291
The raw numbers involved in Fig 8B - 24h post SM exposure
group		Phospho-AKT(Thr308)
		1	2	3	mean	SD
NC shRNA	SM 0μM	367.5	378.5	75.5	273.833	171.85
	SM 100μM	157.5	91.5	92.5	113.833	37.8197
	SM 1000μM	199.5	76	52	109.167	79.146
PARP-1 shRNA	SM 0μM	157.5	188	355.5	233.667	106.607
	SM 100μM	526	477	426.5	476.5	49.7519
	SM 1000μM	254	310.5	376	313.5	61.0553

## Sheet: Raw data for Fig8 C&D
The raw numbers involved in Fig 8C - 6h post SM exposure
group		Phospho-mTOR(Ser2448)
		1	2	3	mean	SD
NC shRNA	SM 0μM	698	790	780	756	50.4777
	SM 100μM	762	775	822	786.333	31.5647
	SM 1000μM	606	613	486	568.333	71.3886
PARP-1 shRNA	SM 0μM	761	842	965	856	102.718
	SM 100μM	744	890	790.5	808.167	74.5861
	SM 1000μM	707	790	571.5	689.5	110.296
The raw numbers involved in Fig 8D - 24h post SM exposure
group		Phospho-mTOR(Ser2448)
		1	2	3	mean	SD
NC shRNA	SM 0μM	595	382	466	481	107.289
	SM 100μM	231	112	255	199.333	76.5789
	SM 1000μM	71.5	76	34	60.5	23.0597
PARP-1 shRNA	SM 0μM	478	503	539	506.667	30.6649
	SM 100μM	409	369	335.5	371.167	36.7979
	SM 1000μM	183.5	117	109	136.5	40.8993
