# Supplementary material for: Effects of poly (ADP-ribose) polymerase-1 (PARP-1) inhibition on sulfur mustard-induced cutaneous injuries in vitro and in vivo
Source: PeerJ. 2016 Apr 4;4:e1890. doi: 10.7717/peerj.1890 (PMC4830333; doi:10.7717/peerj.1890)
Supplement: Table S10 — ABT-888 could reduce the edema induced by SM, when ABT-888 was applied 10 min after SM-treatment. ABT-888 alone group and control group did not show any significant difference. The experiment was performed according to the materials and methods. ∗∗P < 0.01 vs. 0.64 mg SM/ear. All the data are presented as the means ±SEM (n = 5). [file peerj-04-1890-s011.xlsx]

## Sheet: Supplemental Table S10
Table S10. Effect of ABT-888 on relative ear weight in SM-treated mouse ear vesicant model. ABT-888 could reduce the edema induced by SM, when ABT-888 was applied 10min after SM-treatment. ABT-888 alone group and control group did not show any significant difference.
Group	REW (%)
	1	2	3	4	5	mean
Con	-6.62651	7.38636	6.25	-0.546448	-11.9792	-1.1
ABT-888	12.2093	4.91803	2.51572	-1.14286	-6.52174	2.4
0.64mg SM/ear	198.611	205.385	169.863	231.25	226.154	206.25
0.64mg SM/ear+ABT-888	166.906	168.644	157.241	137.821	191.406	164.4**
Note. The experment was performed according to the materials and methods. **P<0.01 vs 0.64mg SM/ear. All the data are presented as the means ± SEM (n=5).
